# Supplementary material
Source: MDPI journal article supplement (https://www.mdpi.com/1999-4907/11/10/1036)

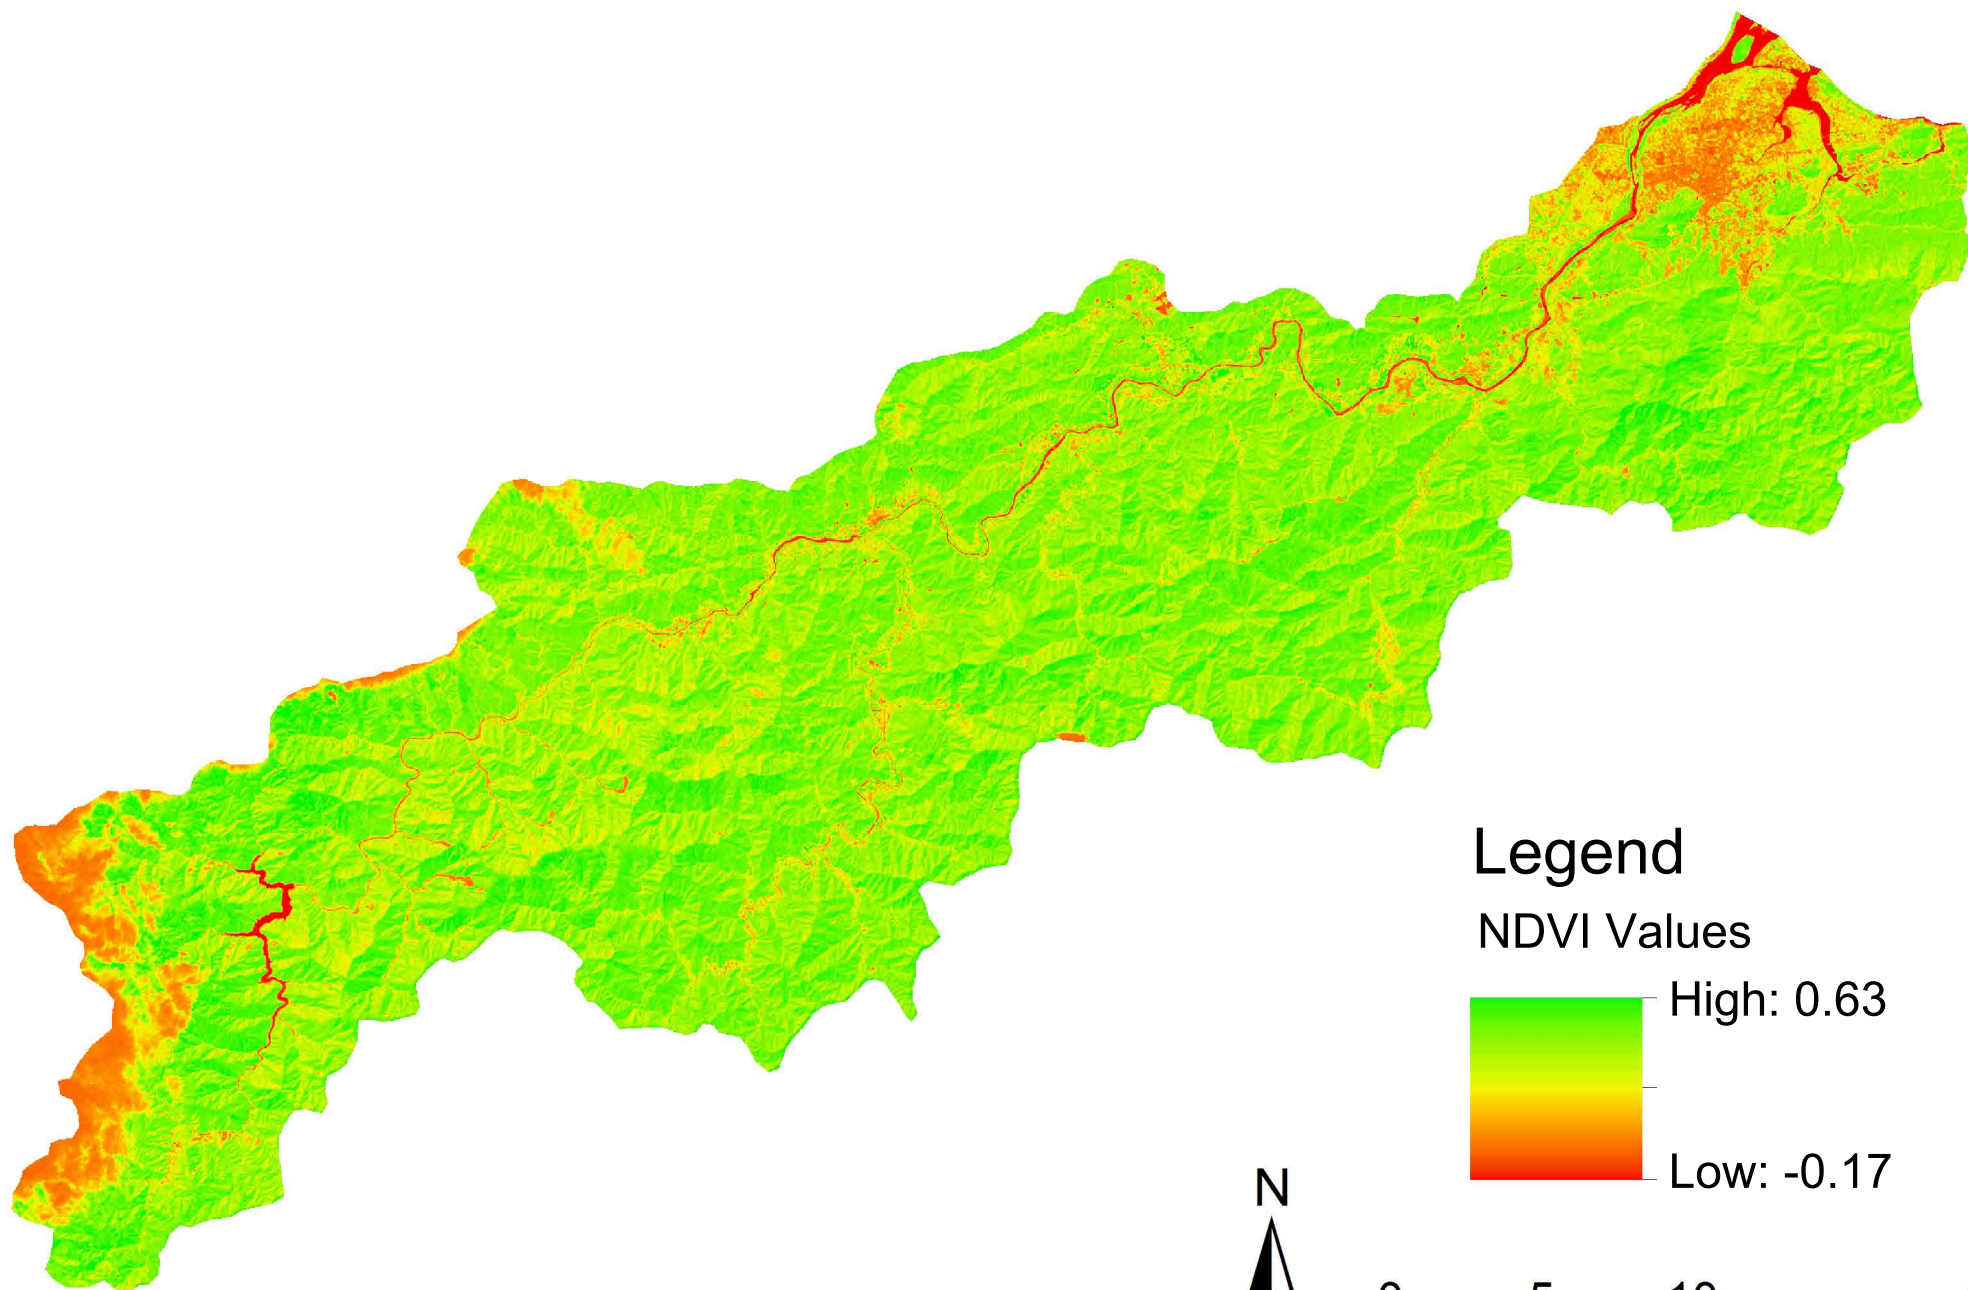

## Legend

NDVI Values

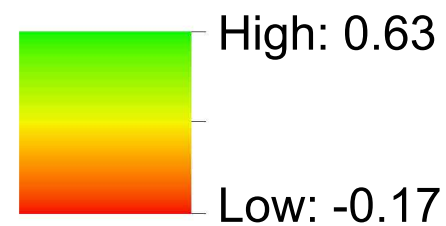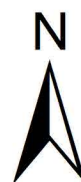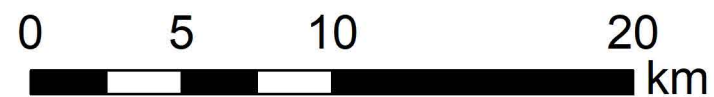

Supplement: s1 [file s1]
